# Supplementary material for: Microporous Fluorescent Poly(D,L-lactide) Acid–Carbon Nanodot Scaffolds for Bone Tissue Engineering Applications
Source: MDPI journal article supplement (doi:10.3390/ma17020449), 2024-01-17
Supplement: s1 [file s1]

# Supplementary Materials

## Microporous Fluorescent Poly(D,L-lactide) acid-Carbon Nanodots Scaffolds for Bone Tissue Engineering Applications

Nicolò Mauro <sup>1\*</sup>, Giovanna Calabrese <sup>2</sup>, Alice Sciortino <sup>3</sup>, Maria G. Rizzo <sup>2</sup>, Fabrizio Messina <sup>3</sup>, Gaetano Giammona <sup>1</sup> and Gennara Cavallaro <sup>1</sup>

- <sup>1</sup> Department of "Scienze e Tecnologie Biologiche Chimiche e Farmaceutiche" (STEBICEF), Università degli Studi di Palermo, Via Archirafi 32, Palermo, 90123, Italy; gaetano.giammona@unipa.it, nicolo.mauro@unipa.it, gennara.cavallaro@unipa.it, Department of Chemical, Biological, Pharmaceutical and Environmental Sciences, University of Messina, Viale Ferdinando Stagno d'Alcontres, 31, 98168 Messina, Italy
- <sup>2</sup> Department of Chemical, Biological, Pharmaceutical and Environmental Sciences, University of Messina, Viale Ferdinando Stagno d'Alcontres, 31, 98168 Messina, Italy
- <sup>3</sup> Department of Chimica e Fisica "E. Segrè", Università degli Studi di Palermo, Via Archirafi 36, Palermo, 90123, Italy; alice.sciortino02@unipa.it, fabrizio.messina@unipa.it
- \* Correspondence: nicolo.mauro@unipa.it; Tel.: +39-09123891908

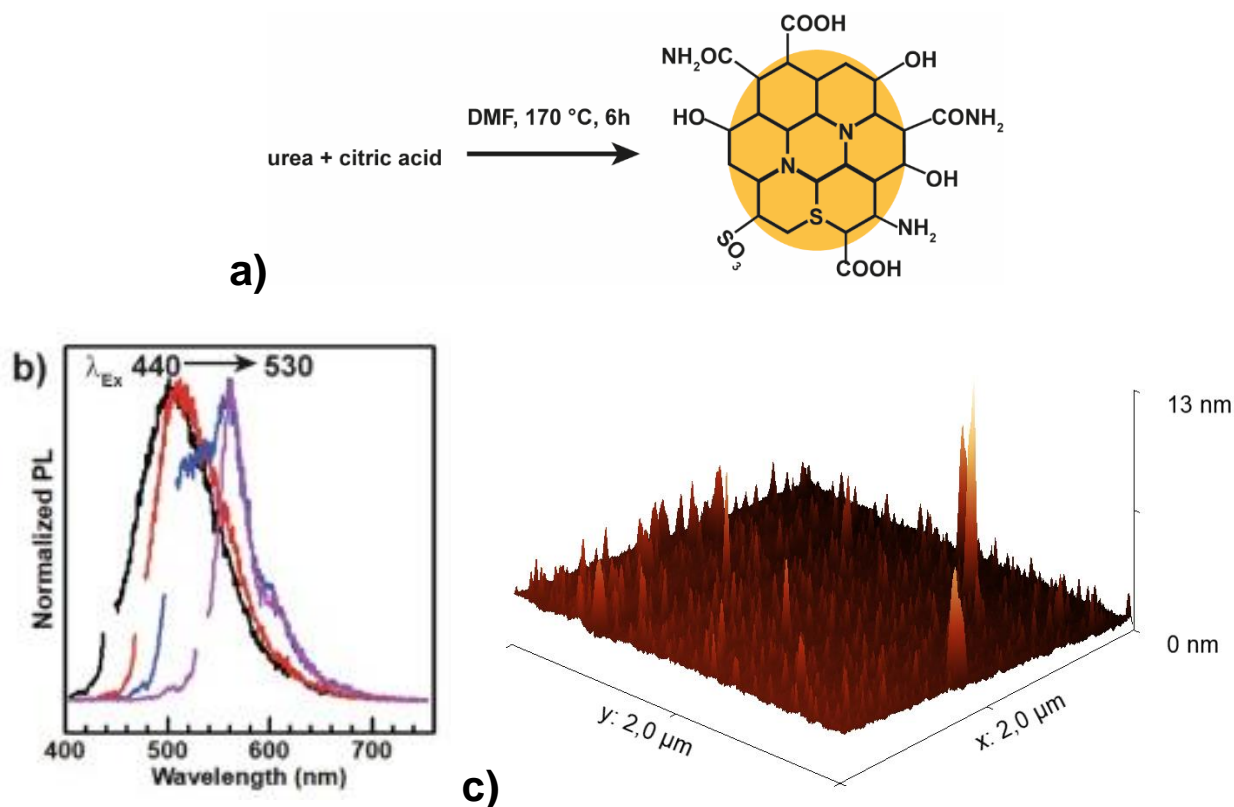

**Figure S1.** Scheme adopted for the synthesis of S,N-doped CDs (a). Atomic force microscopy of the CDs used; average diameter of  $5.3 \pm 0.4$  nm (b). Emission profile of the CDs used (c)

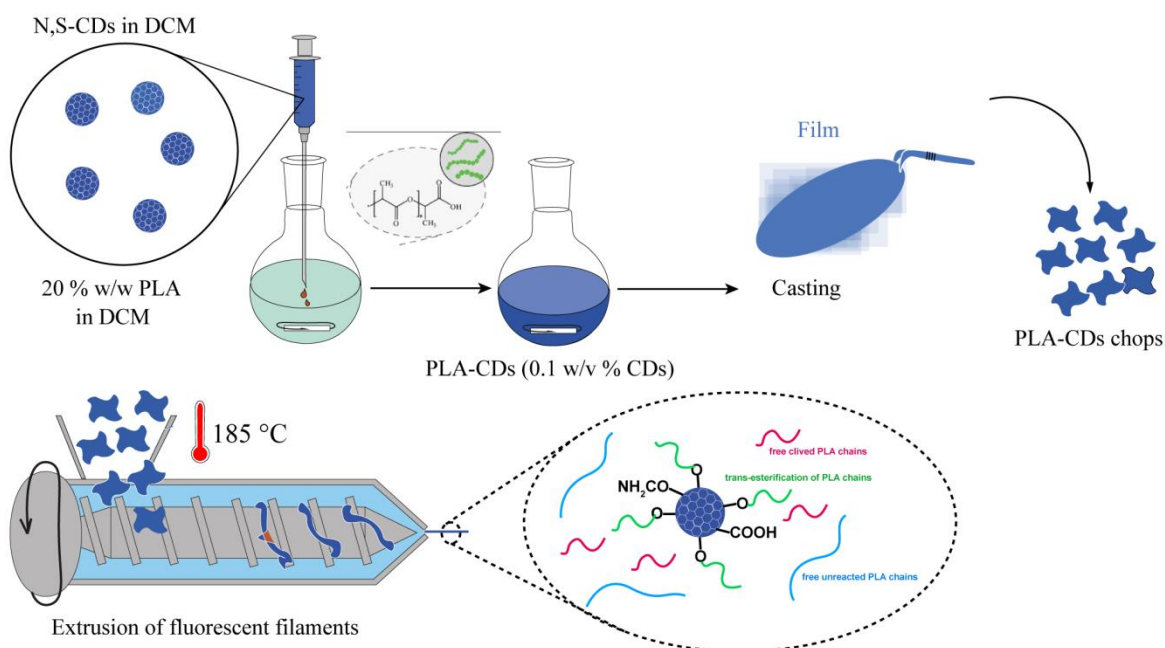

**Figure S2.** Schematic representation of the melt-extrusion transesterification process adopted for the preparation of the PLA-CDs nanocomposite

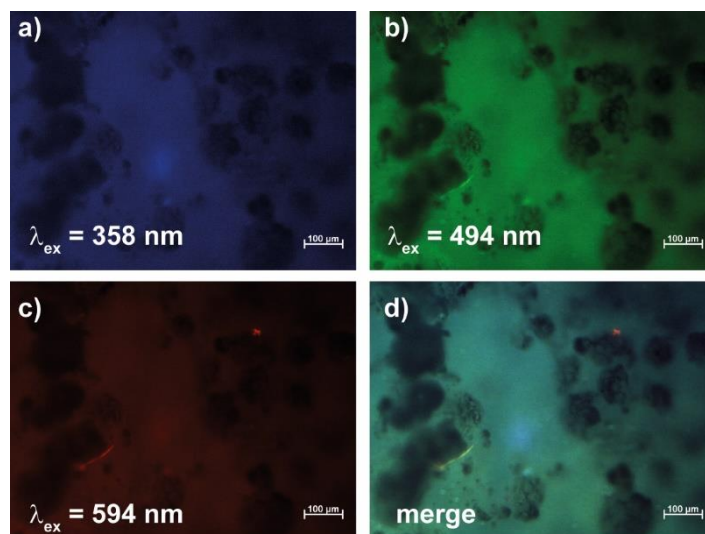

**Figure S3.** Fluorescence microscopy of the PLA-CDs 5% scaffold after 6 months of degradation in PBS pH 7.4 at 37 °C: a) DAPI channel, b) FITC channel, c) TxR channel, d) merge of all channels.
